# Supplementary material for: A Comparative Study on Two Cationic Porphycenes: Photophysical and Antimicrobial Photoinactivation Evaluation
Source: MDPI journal article supplement (doi:10.3390/ijms161125999), 2015-11-12
Supplement: s1 [file s1]

# Supplementary Materials: A Comparative Study on Two Cationic Porphycenes: Photophysical and Antimicrobial Photoinactivation Evaluation

Rubén Ruiz-González, Montserrat Agut, Elena Reddi and Santi Nonell

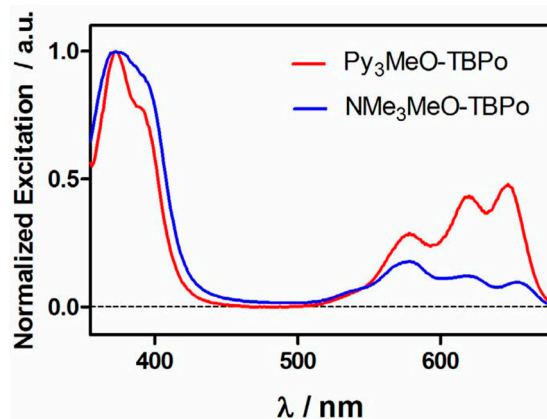

**Figure S1.** Excitation spectra of the porphycene's fluorescence at 700 nm in water.

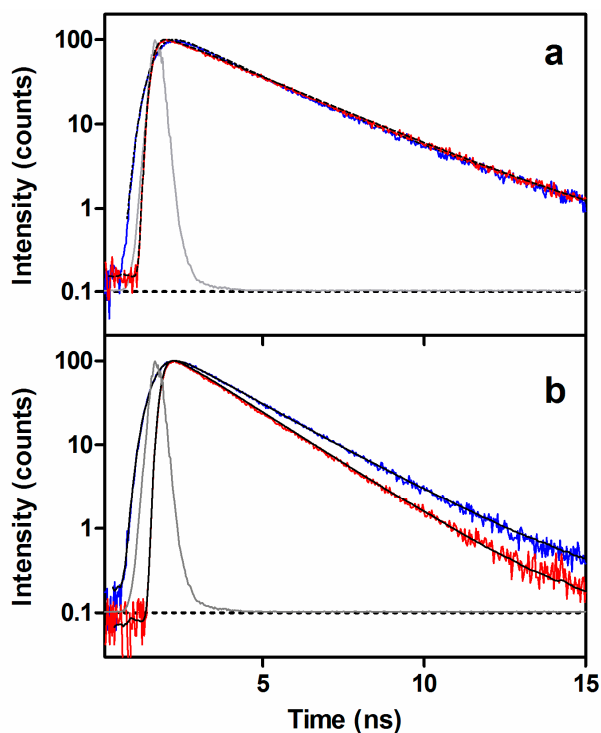

**Figure S2.** Time-resolved fluorescence decays in MeOH (a) and water (b) for porphycene 1 (red) and 2 (blue). Signal, fit (black) and instrument's response function (grey) at 700 nm upon excitation at 375 nm.

**Table S1.** Flow cytometry fluorescence distribution upon binding experiments.

| Compound     | Fluorescence Intensity/Counts |            |                      |
|--------------|-------------------------------|------------|----------------------|
|              | PS Removal (Washing)          | MRSA       | <i>P. aeruginosa</i> |
| Py3MeO-TBPo  | NO                            | 2600 ± 900 | 4200 ± 1000          |
|              | YES                           | 2100 ± 400 | 4300 ± 2000          |
| NMe3MeO-TBPo | NO                            | 2600 ± 700 | 2600 ± 900           |
|              | YES                           | 2000 ± 900 | 2600 ± 700           |

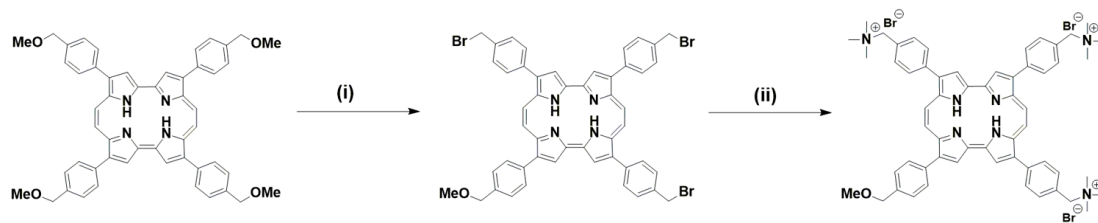

**Scheme S1.** Synthetic route to compound 2. (i) HBr; (ii) NMe<sub>3</sub>.

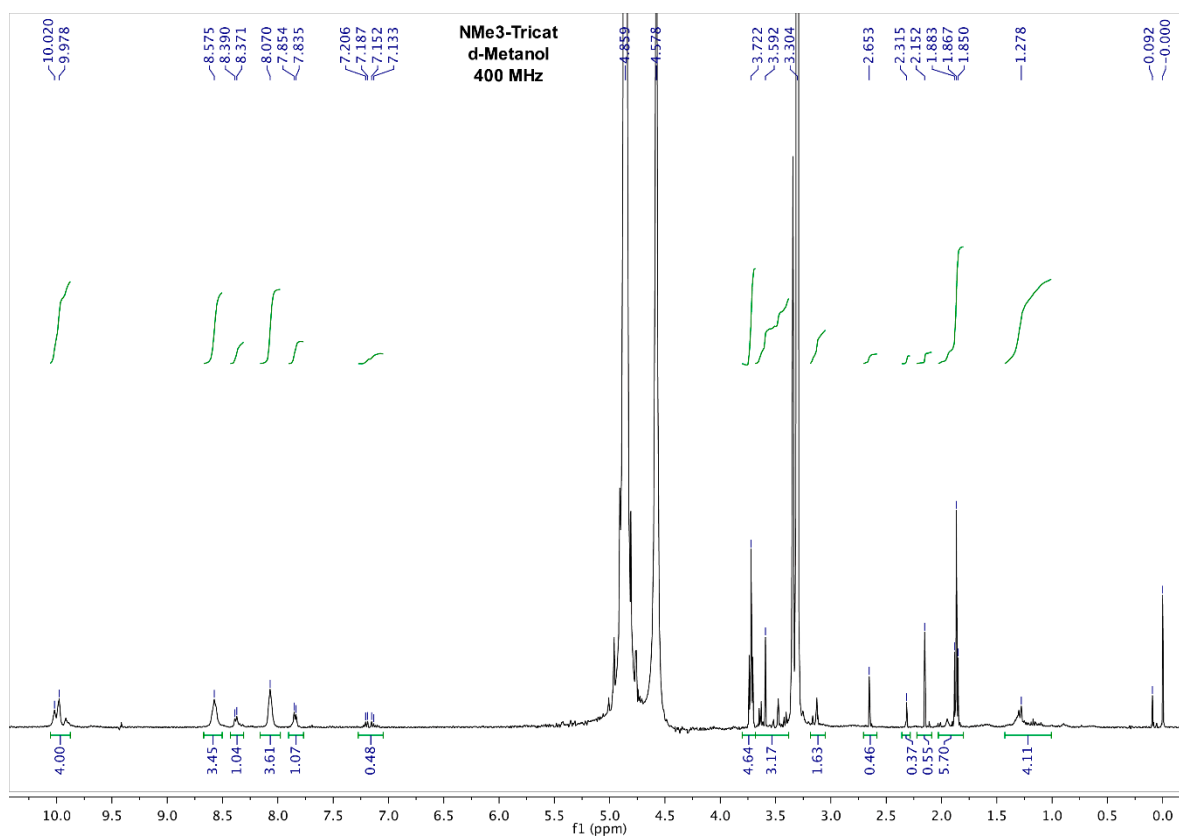

**Figure S3.** <sup>1</sup>H-NMR of porphyrine 2 in deuterated methanol.
